# Supplementary material
Source: Springer Nature journal article supplement (https://www.springermedizin.de/resource/supplementary/12906_2004_43_MOESM2_ESM.pdf/9523878)

**Menstruating Days Per Cycle**

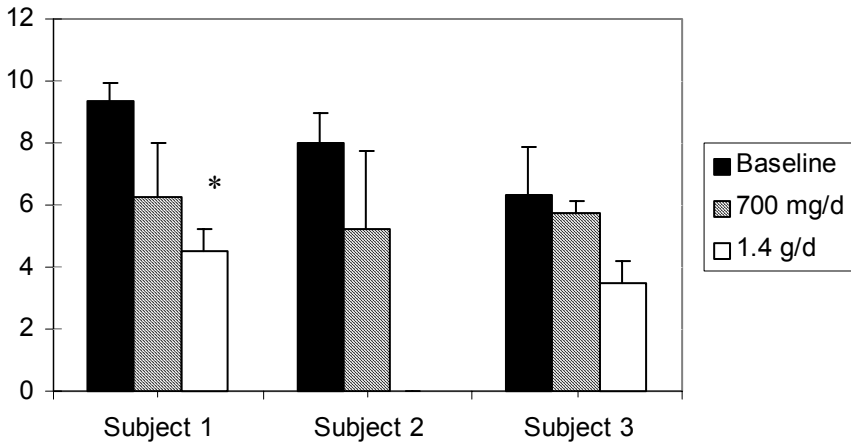

Supplement: MOESM2 [file 9523878]
